# Supplementary material for: Subtle structure matters: boosting surface-directed photoelectron transfer via the introduction of specific monovalent oxygen vacancies in TiO2
Source: Royal Society of Chemistry journal article supplement (doi:10.1039/d1cp02787e), 2021-01-01
Supplement: d1cp02787e1.pdf [file d1cp02787e1.pdf]

## Supplementary Information

*for*

### Subtle Structure Matters: Boosting Surface-directed Photoelectron Transfer via the Introduction of Specific Monovalent Oxygen Vacancies in TiO<sub>2</sub>

Fei Li, Dong Wang\* and Xue-Qing Gong\*

Key Laboratory for Advanced Materials, Centre for Computational Chemistry and Research Institute of Industrial Catalysis, School of Chemistry and Molecular Engineering, East China University of Science and Technology, 130 Meilong Road, Shanghai, 200237, P. R. China.

\*Corresponding authors: [wangd@ecust.edu.cn](mailto:wangd@ecust.edu.cn); [xgong@ecust.edu.cn](mailto:xgong@ecust.edu.cn)

#### 1. Supplementary results

**Table S1.** Two examples (shown as Figure 2a and Figure 4c (III-IV) in the article) for comparing difference in calculated energy changes (energy unit: eV) by the PBE+U and HSE06 single-point methods.

| Method | Figure 2a | Figure 4c (III-IV) |
|--------|-----------|--------------------|
| PBE+U  | -0.37     | -0.02              |
| HSE06  | -0.34     | -0.01              |

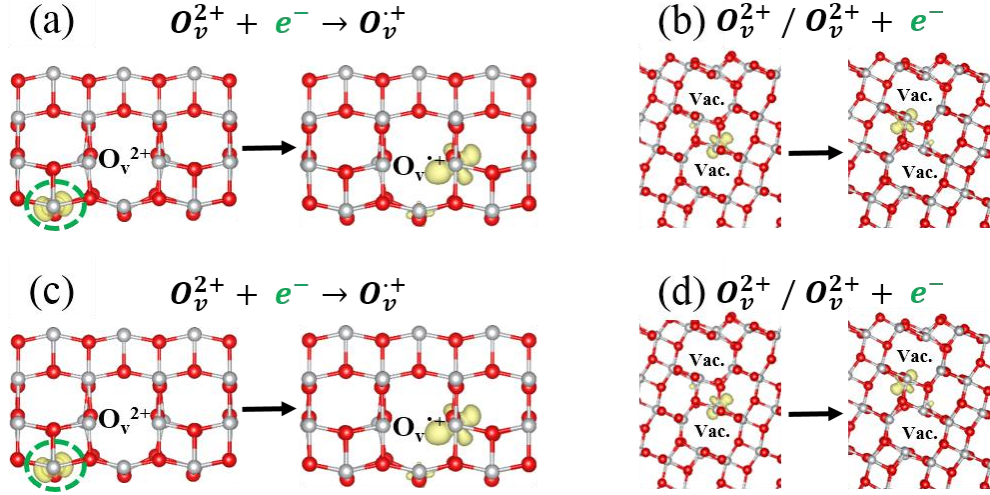

**Figure S1.** Calculated structures and spin-polarized charge densities (iso-value of 0.008  $|e|/\text{Bohr}^3$ ) of two examples (shown as (a, c) Figure 2a and (b, d) Figure 4c (III-IV) in the manuscript) obtained using (a, b) PBE+U and (c, d) HSE06 single-point methods.

**Table S2.** Calculated energy change ( $\Delta E$ ) of an additional electron migrating from bulk  $\text{Ti}_{6c}$  to surface  $\text{Ti}_{5c}$  in two anatase  $\text{TiO}_2$  slabs containing five and eight Ti-layers, respectively. We considered two approaches for simulating an additional electron: i) adding one electron via setting the NELECT parameter in the VASP; ii) introducing a H atom on the opposite surface of  $\text{TiO}_2$  slab, which produces a protonated  $\text{O}_{2c}$  and an additional electron trapped at a specific Ti ion.

| $\Delta E / \text{eV}$          | Introducing 1 $e^-$ | Introducing 1 H |
|---------------------------------|---------------------|-----------------|
| 5-Ti-layer $p(2 \times 4)$ slab | -0.08               | 0.00            |
| 8-Ti-layer $p(2 \times 3)$ slab | -0.05               | 0.02            |

**Table S3.** Calculated energy change ( $\Delta E$ ) of an additional electron migrating from a bulk  $\text{O}_v^{2+}$  to anatase  $\text{TiO}_2(101)$  surface. We considered two approaches for removing an electron: i) setting the NELECT parameter in the VASP; ii) introducing a OH group on the opposite surface of  $\text{TiO}_2$  slab, which captures an electron and turns into  $\text{OH}^-$  ions.

| $\Delta E / \text{eV}$          | Removing 1 $e^-$ | Introducing 1 OH |
|---------------------------------|------------------|------------------|
| 5-Ti-layer $p(2 \times 4)$ slab | 0.11             | 0.06             |
| 8-Ti-layer $p(2 \times 3)$ slab | 0.15             | 0.11             |

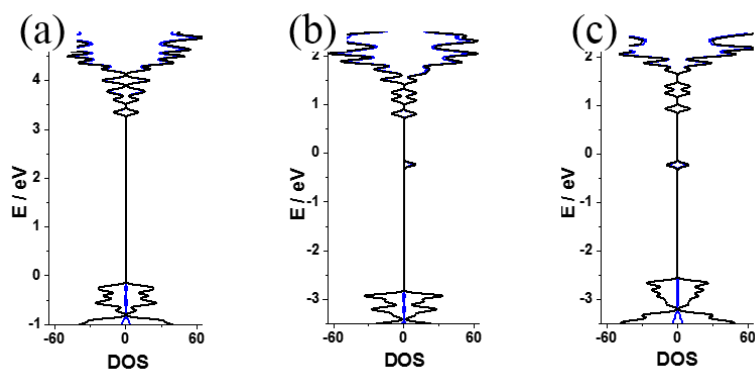

**Figure S2.** Calculated electronic total DOSs (black lines) and Ti 3d PDOSs (blue lines) of (a) divalent  $O_v^{2+}$ , (b) monovalent  $O_v^{+}$ , and (c) neutral  $O_v^{\cdot}$  in bulk anatase  $TiO_2$ . The position of the Fermi Level is aligned at zero in energy coordinate.

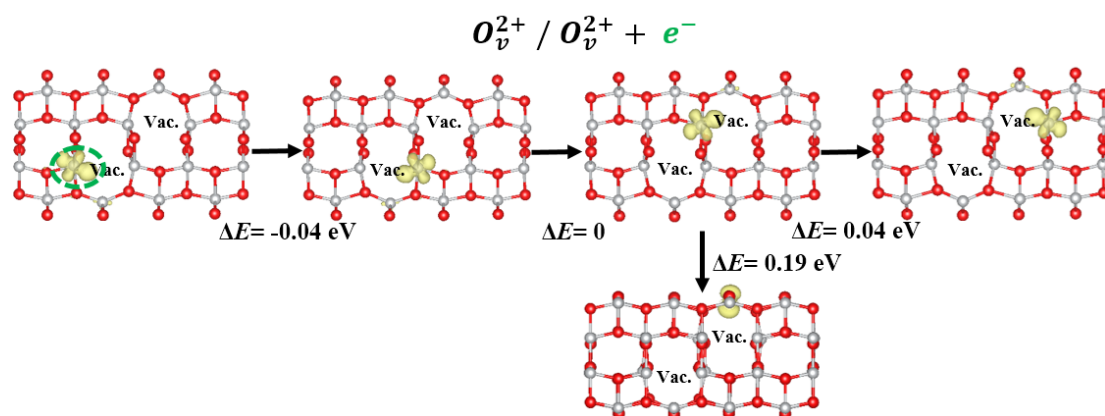

**Figure S3.** Calculated charge densities (iso-value of  $0.005 |e|/\text{Bohr}^3$ ) and energies ( $\Delta E$ ) of an additional electron (indicated by green circles) migrating along the  $O_v^{2+}$  chain in bulk anatase  $TiO_2$ . The energy cost of electron deviation from symmetric  $Ti_{5c}$  to the odd one is presented in the lower panel.

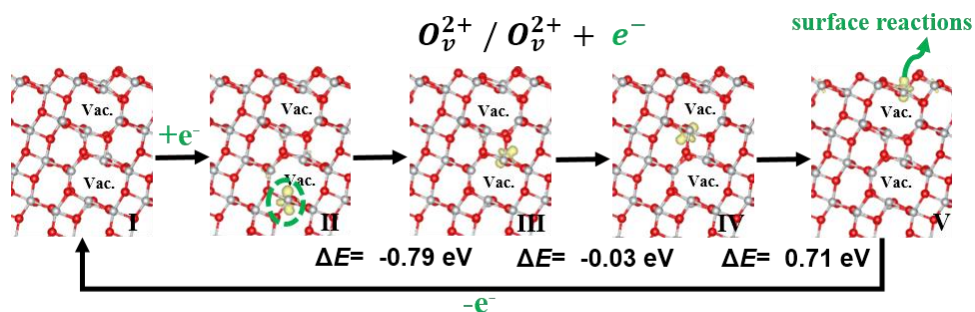

**Figure S4.** Calculated charge densities (iso-value of  $0.008 |e|/\text{Bohr}^3$ ) and energies ( $\Delta E$ ) of an additional electron (indicated by green circles) migrating along two neighboring  $O_v^{2+}$  in an eight-Ti-layer  $TiO_2(101)$  slab.

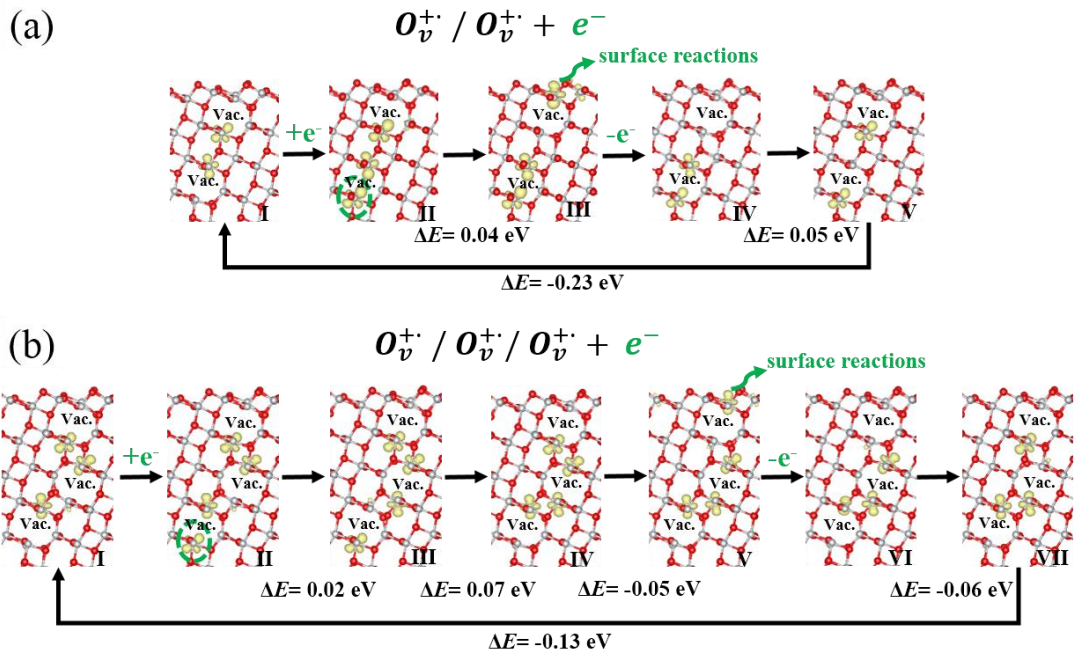

**Figure S5.** Calculated charge densities (iso-value of 0.008  $|e|/\text{Bohr}^3$ ) and energies ( $\Delta E$ ) of an additional electron (indicated by green circles) migrating along (a) a  $O_v^{\cdot+}/O_v^{\cdot+}$  chain with different combination modes and (b) a longer chain of  $O_v^{\cdot+}/O_v^{\cdot+}/O_v^{\cdot+}$  in eight-Ti-layer (101) slab.

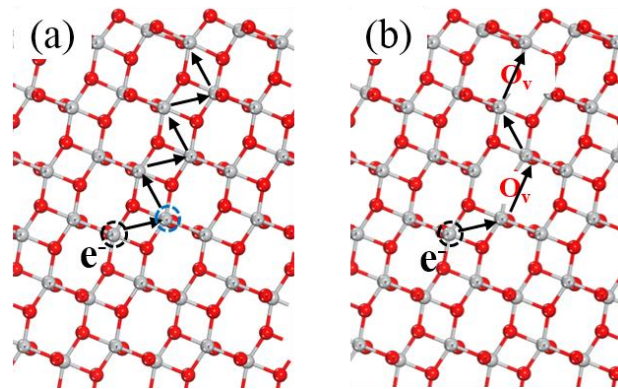

**Figure S6.** Schematic diagram of an excess electron, initially positioned at the fourth Ti-layer below the surface, migrating (a) in stoichiometric  $\text{TiO}_2(101)$  or (b) along a  $O_v/O_v$  chain in defective slabs towards the surface, as indicated by black arrows.

## 2. Estimation approach on electron transfer efficiency

We developed an approach to roughly estimate the probability of a photoelectron successfully reaching the surface. Three major assumptions are made as follows:

(1) the electron-hole recombination probability is constant (defined as  $p$ ), being irrelevant with the electron localization position (e.g., near the surface or in the bulk

region) or the presence/absence of  $O_v$  defects;

(2) for a photoelectron localized at one Ti cation, in the subsequent step it will either move to an adjacent Ti (probability:  $1-p$ ) or recombine with a photohole;

(3) for each successful electron transfer step (apart from the recombination), considering the small migration barrier of less than 0.3 eV,<sup>1</sup> the chance of electron hopping (from this trapping site) to the nearest Ti cations obeys the Boltzmann distribution. Thus, the probability of a single-step electron transfer along a particular direction can be computed by dividing its odds by the sum of odds of all possible directions.

Regarding the comparison of photoelectron transfer efficiency in stoichiometric anatase  $TiO_2(101)$  or along a vertical  $O_v^{++}$  chain, the minimum steps of surface-directed electron transfer (from the same starting point) is defined as  $n$  and  $m$ , respectively. As illustrated in Figure S6b, the presence of  $O_v$  introduces additional electron transfer channels (between two face-to-face  $Ti_{5c}$  at the  $O_v$ ) with longer single-step migration distance pointing to the surface, and consequently the number of electron transfer steps (from the same initial position) along the vertical  $O_v^{++}$  chain would be less than that in stoichiometric slabs (i.e.,  $m < n$ ).

#### **a. In stoichiometric anatase $TiO_2(101)$**

In stoichiometric anatase  $TiO_2(101)$  slabs, because of the obvious difference in electron transfer energies between the last surface-reaching step (from the subsurface) and the preceding  $n-1$  steps, we analyzed separately the two parts:

I. Each  $Ti_{6c}$  cation (see black circle for example in Figure S6a) below the subsurface has four nearest  $Ti_{6c}$  neighbors with comparable electron trapping energies ( $\pm 0.01$  eV), among which only one  $Ti_{6c}$  (dashed blue circle) positions closer to the surface that benefits the surface-directed photoelectron transfer. Thus, the probability of a single-step electron transfer toward the surface is  $\frac{1-p}{4}$ , while that for continuous  $n-1$  steps of successful photoelectron transfer (before reaching the surface) would be  $\left(\frac{1-p}{4}\right)^{n-1}$ .

II. For the last surface-reaching step (from the subsurface), a subsurface  $Ti_{6c}$  cation also has four nearest  $Ti_{6c}$  neighbors. But the difference is that, while three of them all show comparable electron transfer energies ( $\pm 0.01$  eV), electron transfer to the one on the surface is endothermic by 0.04 eV. Accordingly, based on the Boltzmann distribution  $p_1/p_2 = \exp[\Delta E/(k_B \cdot T)]$  where  $p_1$  and  $p_2$  are the populations of the two possible electron trapping states/sites, the probability of photoelectron

arriving at the surface (with a 0.05 eV disadvantage in energetics) was estimated to be  $\sim 7$  times lower than hopping to the other three migration sites, being  $\frac{1}{22} \times (1 - p)$ .

Therefore, the overall probability of  $n$ -step photoelectron transfer to the surface in stoichiometric anatase TiO<sub>2</sub>(101) is  $P_{stoichi} = 0.05 \times \frac{(1-p)^n}{4^{n-1}}$ .

### b. Along the vertical O<sub>v</sub><sup>+</sup> chain

As depicted in Figure S6b, this pathway can also be broadly divided into two parts: I. a single-step electron collection by O<sub>v</sub><sup>+</sup> and II. continues  $m-1$  steps of electron migration along the vertical O<sub>v</sub><sup>+</sup> chain.

For the part I, one electron is initially localized at a Ti<sub>6c</sub> cation adjacent to a O<sub>v</sub><sup>+</sup> (see black circle for example in Figure S6b), and it can either move to three neighboring Ti<sub>6c</sub> with comparable electron transfer energies ( $\pm 0.01$  eV), or to one Ti<sub>5c</sub> at the O<sub>v</sub><sup>+</sup> with exothermic energies of -0.25 eV. Similar to the surface-reaching step in stoichiometric anatase TiO<sub>2</sub>(101), we can obtain the probability of the electron collection by O<sub>v</sub><sup>+</sup> on the basis of Boltzmann distribution, which was deduced to be  $\frac{23409}{23412} \times (1 - p)$ .

For the part II, while electron transfer along the O<sub>v</sub><sup>+</sup> chain is generally favored with a maximum energy cost of 0.03 eV, any deviations either to the odd Ti<sub>5c</sub> of O<sub>v</sub> or bulky Ti<sub>6c</sub> nearby was found endothermic on average by 0.28 eV. Obviously, a single-step of electron migration along the O<sub>v</sub><sup>+</sup> chain is at least 0.25 eV more favorable in energetics, which corresponds to 15897 times higher in probability than any deviations from the O<sub>v</sub><sup>+</sup> chain according to the Boltzmann distribution. Thus, the probability of continuous  $m-1$  steps of photoelectron transfer along the O<sub>v</sub><sup>+</sup> chain would be  $[\frac{15897}{15901} \times (1 - p)]^{m-1}$ .

Overall, the probability of  $m$ -step photoelectron transfer to the surface along the vertical O<sub>v</sub><sup>+</sup> chain is  $P_{O_v^+} = \frac{23409}{23412} \times [\frac{15897}{15901}]^{m-1} \times (1 - P)^m$ .

### c. Comparison of the two pathways

From the analysis above, the probability for a photoelectron reaching the surface is largely determined by i) the migration distance below the surface ( $n$  or  $m$ ), ii) the number of O<sub>v</sub> involved, and iii) the step-by-step electron transfer energies. One can compare readily the probability of successful photoelectron transfer to the surface via the two pathways:  $\frac{P_{O_v^+}}{P_{stoichi}} = 20 \times \left(\frac{15897}{15901}\right)^{m-1} \times 4^{n-1} \times (1 - P)^{m-n}$

$$> 20 \times \left(\frac{15897}{15901}\right)^{n-1} \times 4^{n-1}; n > m.$$

### Reference

1. N. A. Deskins and M. Dupuis, *Phys. Rev. B*, 2007, **75**, 195212.
